# Supplementary material for: Beyond the numbers: A phenomenological analysis of women’s childbirth experiences in Spain’s evolving healthcare system
Source: bioRxiv or medRxiv preprint supplement (doi:10.1101/2024.06.13.24308819), 2024-06-13
Supplement: Supplementary file [file media-1.pdf]

Table 1. Participants characteristics and birth details.

| <b>Pseudonym</b> | <b>Age range</b> | <b>Parity</b> | <b>Type of birth</b>      | <b>Onset of labour</b> | <b>Model of care</b> |
|------------------|------------------|---------------|---------------------------|------------------------|----------------------|
| Participant 1    | 30-35            | Primiparous   | Instrumental birth        | Induced                | Combined care        |
| Participant 2    | 30-35            | Multiparous   | Unplanned caesarean birth | Spontaneous            | OU                   |
| Participant 3    | 40-45            | Multiparous   | Spontaneous vaginal birth | Spontaneous            | OU                   |
| Participant 4    | 35-40            | Multiparous   | Spontaneous vaginal birth | Spontaneous            | OU                   |
| Participant 5    | 35-40            | Primiparous   | Instrumental birth        | Induced                | OU                   |
| Participant 6    | 30-35            | Primiparous   | Water birth               | Spontaneous            | MLU                  |
| Participant 7    | 30-35            | Multiparous   | Water birth               | Spontaneous            | MLU                  |
| Participant 8    | 30-35            | Primiparous   | Spontaneous vaginal birth | Spontaneous            | Combined care        |
| Participant 9    | 25-30            | Primiparous   | Spontaneous vaginal birth | Spontaneous            | MLU                  |
| Participant 10   | 30-35            | Primiparous   | Unplanned caesarean birth | Induced                | OU                   |
| Participant 11   | 40-45            | Primiparous   | Spontaneous vaginal birth | Spontaneous            | MLU                  |
| Participant 12   | 30-35            | Primiparous   | Spontaneous vaginal birth | Spontaneous            | Combined care        |
| Participant 13   | 25-30            | Multiparous   | Spontaneous vaginal birth | Induced                | OU                   |
| Participant 14   | 20-25            | Primiparous   | Instrumental birth        | Induced                | OU                   |
| Participant 15   | 35-40            | Primiparous   | Instrumental birth        | Induced                | OU                   |
| Participant 16   | 30-35            | Primiparous   | Water birth               | Spontaneous            | Combined care        |
| Participant 17   | 40-45            | Primiparous   | Spontaneous vaginal birth | Spontaneous            | Combined care        |
| Participant 18   | 30-35            | Multiparous   | Unplanned caesarean birth | Spontaneous            | Combined care        |
| Participant 19   | 30-35            | Primiparous   | Spontaneous vaginal birth | Spontaneous            | MLU                  |

a- MLU: Midwifery-led unit, aligned with a biopsychosocial model of care.

b- OU: Obstetric unit, aligned with a biomedical model of care.

c- Combined care: transfer from MLU to OU during or after labour.

Table 2. Focus group interview guide.

|                                                                                                         |
|---------------------------------------------------------------------------------------------------------|
| <b>1. General experience of childbirth</b>                                                              |
| Icebreaker: In one word, how would you describe your childbirth experience?                             |
| Can you share your childbirth experience and what it meant for you, your baby and your family?          |
| <b>2. Negative aspects of childbirth</b>                                                                |
| What would you change from your childbirth experience?                                                  |
| <b>3. Positive aspects of childbirths</b>                                                               |
| What do you believe is necessary for a childbirth experience to be positive?                            |
| When prioritising, of all we have discussed, what do you consider was most important during childbirth? |
| <b>4. Additional aspects</b>                                                                            |
| Would you add anything else that has not been mentioned by you or any member of the group?              |

Table 3. Themes and sub-themes identified.

| <b>Themes</b>                                     | <b>Subthemes</b>                                                      |
|---------------------------------------------------|-----------------------------------------------------------------------|
| 1. Shaping birth expectations                     | 1.1 Cultural and social factors                                       |
|                                                   | 1.2 Previous obstetric experiences                                    |
|                                                   | 1.3 Knowledge, interaction and healthcare accessibility               |
| 2. The childbirth essentials                      | 2.1 One to one care                                                   |
|                                                   | 2.2 Pain relief strategies                                            |
|                                                   | 2.3 Privacy and dignity                                               |
|                                                   | 2.4 Respectful care                                                   |
| 3. Navigating the “positives” and the “negatives” | 3.1 Meeting birth expectations                                        |
|                                                   | 3.2 Meeting elements of “value” in care                               |
|                                                   | 3.3 Midwifery role on “childbirth essentials” and “elements of value” |
